# Supplementary material for: Diversity, Climatic Correlations, and Biocontrol Prospects of Seed-Borne Fungal Endophytes in Egyptian Maize
Source: Research Square preprint supplement (doi:10.21203/rs.3.rs-7290730/v1), 2025-10-16
Supplement: Supplementary file 1 [file b3567baa337b52502f178347.docx]

**Supplementary tables**

**Diversity, Climatic Correlations, and Biocontrol Prospects of Seed-Borne Fungal Endophytes in Egyptian Maize**

Khadiga A. Hasana, Hoda M. Solimana, Khalid M. Ghoneemb* and Yasser M. Shabanac,d*

aBotany Department, Faculty of Science, Mansoura University, Mansoura 35516, Egypt; khadiga.ahmed.php@gmail.com (K.A.H.); [dr.hodasoliman_1964@yahoo.com](mailto:dr.hodasoliman_1964@yahoo.com) (H.M.S.)

bSeed Pathology Research Department, Plant Pathology Research Institute, Agricultural Research Center, Giza 12619, Egypt; [khalidghoneem@arc.sci.eg](mailto:khalidghoneem@arc.sci.eg); https://orcid.org/0000-0003-4629-6399 (K.M.G.)

cDepartment of Plant Pathology, Faculty of Agriculture, Mansoura University, Mansoura 35516, Egypt; [yassershabana2@yahoo.com](mailto:yassershabana2@yahoo.com) (Y.M.S.)

dNational Council for Agricultural and Food Research, Academy of Scientific Research and Technology, Cairo 11516, Egypt; [yassershabana2@yahoo.com](mailto:yassershabana2@yahoo.com) (Y.M.S.)

Correspondence, [khalidghoneem@arc.sci.eg](mailto:khalidghoneem@arc.sci.eg) (K.M.G.); [yassershabana2@yahoo.com](mailto:yassershabana2@yahoo.com) (Y.M.S.)

**Table S1. Colony-forming unit (CFU) counts of seed-borne endophytic fungi isolated from maize grains collected across 18 Egyptian governorates.**

| **Governorate** | **Ab. spp.** | **A. alt** | **Arth. spp.** | **Asp. clav** | **Asp. flav** | **Asp. fum** | **Asp. glau** | **Asp. Nig** | **Asp. Ochr** | **Asp. Tam** | **Asp. Terr** | **Auro. pull.** | **B. haw** | **B. may** | **B. tet** | **Bot. cin** | **Ceph.acr.** | **Chaet spp.** | **Cl. spp.** | **Coll. spp.** | **Cu. haw** | **Epi. Pur** | **F. inc** | **F. spp** | **Fus. Ver** | **Muc. spp.** | **Nig. spp.** | **Pen. spp.** | **Phom. spp.** | **R. so** | **R. sto** | **St. spp.** | **Trichod. spp.** | **Ulo. spp.** | **Total CFU** |
| --- | --- | --- | --- | --- | --- | --- | --- | --- | --- | --- | --- | --- | --- | --- | --- | --- | --- | --- | --- | --- | --- | --- | --- | --- | --- | --- | --- | --- | --- | --- | --- | --- | --- | --- | --- |
| **New Valley** | **0** | **13.9** | **0** | **0** | **74** | **4** | **0** | **228** | **0** | **0** | **4** | **94** | **0** | **12** | **0** | **0** | **0** | **0** | **16** | **0** | **0** | **2** | **0** | **0** | **16** | **0** | **13.9** | **124** | **0** | **0** | **0** | **0** | **4** | **0** | **605.8** |
| **Luxor** | **2** | **0** | **0** | **4** | **264** | **1** | **1** | **151** | **4** | **0** | **3** | **156** | **0** | **4** | **0** | **0** | **2** | **2** | **56** | **0** | **0** | **3** | **9** | **3** | **62** | **0** | **36** | **106.2** | **0** | **0** | **7** | **10** | **37** | **0** | **923.2** |
| **Assiut** | **0** | **18** | **0** | **1** | **88** | **8** | **26** | **46** | **0** | **0** | **4** | **216** | **0** | **2** | **0** | **0** | **0** | **4** | **118** | **0** | **0** | **4** | **8** | **0** | **36** | **0** | **22** | **110** | **0** | **0** | **0** | **4** | **12** | **0** | **727.0** |
| **Aswan** | **0** | **1.6** | **0** | **6.4** | **168** | **0** | **0** | **171.2** | **1.6** | **0** | **38.4** | **12.8** | **0** | **1.6** | **0** | **1.6** | **0** | **0** | **0** | **0** | **0** | **0** | **0** | **0** | **81.6** | **0** | **1.6** | **41.6** | **0** | **0** | **3** | **0** | **45.2** | **0** | **576.2** |
| **Al-Behera** | **0** | **6.7** | **0** | **2** | **25.3** | **41.3** | **2.7** | **17.3** | **1.3** | **0** | **0** | **36** | **2** | **0** | **1.3** | **0** | **0** | **10.7** | **40** | **0** | **0** | **0** | **16** | **8** | **61.3** | **4** | **8** | **69.3** | **1.3** | **0** | **0** | **4** | **2.7** | **1.3** | **362.7** |
| **Al-Gharbia** | **0** | **2** | **0** | **0** | **136** | **0** | **0** | **50** | **0** | **0** | **4** | **113** | **0** | **0** | **0** | **0** | **8** | **4** | **4** | **0** | **0** | **0** | **0** | **12** | **132** | **0** | **2** | **64** | **0** | **0** | **0** | **2** | **24** | **0** | **557.0** |
| **Al-Sharkia** | **0** | **0** | **0** | **0** | **18** | **0** | **0** | **16** | **0** | **0** | **0** | **0** | **0** | **0** | **0** | **0** | **18** | **0** | **0** | **1** | **0** | **0** | **0** | **20** | **68** | **0** | **0** | **18** | **0** | **0** | **26** | **0** | **12** | **0** | **197.0** |
| **Al-Dakhlia** | **0** | **4** | **0** | **2** | **116** | **0** | **0** | **74** | **0** | **0** | **0** | **54** | **2** | **2** | **0** | **0** | **18** | **0** | **0** | **0** | **0** | **0** | **3** | **0** | **214** | **0** | **4** | **73.3** | **0** | **0** | **4** | **0** | **2** | **0** | **572.3** |
| **Damietta** | **0** | **2.6** | **0** | **1.6** | **76.8** | **0** | **0** | **9.6** | **0** | **0** | **0** | **11.2** | **0** | **0** | **0** | **0** | **0** | **0** | **11.2** | **0** | **0** | **0** | **0** | **0** | **6.4** | **0** | **0** | **17.6** | **0** | **0** | **0** | **0** | **0** | **0** | **137.0** |
| **Kafr El-Sheikh** | **0** | **0** | **0** | **0** | **22.4** | **1.6** | **0** | **241.6** | **0** | **0** | **0** | **0** | **0** | **1.6** | **0** | **0** | **0** | **6.4** | **1.6** | **0** | **0** | **0** | **0** | **0** | **652.8** | **0** | **3.2** | **68.8** | **0** | **0** | **1.6** | **0** | **8** | **0** | **1009.6** |
| **Alexandria** | **0** | **8** | **0** | **0** | **40** | **0** | **0** | **108** | **0** | **0** | **28** | **186** | **0** | **6** | **0** | **0** | **6** | **10** | **18** | **0** | **0** | **0** | **6** | **0** | **26** | **0** | **2** | **80** | **0** | **0** | **0** | **0** | **4** | **0** | **528.0** |
| **Al-Nobaria** | **0** | **13** | **0** | **0** | **281** | **2** | **2** | **366** | **0** | **0** | **0** | **49** | **0** | **2** | **0** | **0** | **1** | **2** | **51** | **0** | **1** | **2** | **1** | **0** | **17** | **0** | **40** | **104** | **0** | **0** | **0** | **0** | **2** | **0** | **936.0** |
| **Al-Giza** | **0** | **6** | **0** | **2** | **88.2** | **0** | **0** | **39** | **2** | **0** | **0** | **352** | **0** | **2** | **0** | **0** | **0** | **22** | **14** | **0** | **0** | **2** | **0** | **4** | **18** | **2** | **28** | **516** | **0** | **0** | **0** | **0** | **14** | **0** | **1111.2** |
| **Al-Fayoum** | **0** | **0** | **0** | **0** | **21** | **6** | **0** | **167** | **0** | **1** | **0** | **0** | **0** | **0** | **0** | **3** | **51** | **0** | **11** | **0** | **0** | **1** | **0** | **3** | **94** | **0** | **11.4** | **331** | **0** | **0** | **0** | **0** | **2** | **0** | **702.4** |
| **Al-Ismaelia** | **0** | **22** | **0** | **0** | **96** | **0** | **0** | **80** | **0** | **0** | **34** | **310** | **0** | **8** | **0** | **4** | **2** | **0** | **36** | **0** | **4** | **4** | **14** | **14** | **66** | **0** | **28** | **270.0** | **0** | **0** | **6** | **0** | **28** | **0** | **1026.0** |
| **Port Said** | **0** | **4.8** | **0** | **102.4** | **96** | **0** | **0** | **256** | **0** | **0** | **0** | **76.8** | **0** | **8** | **0** | **6.4** | **9.6** | **3.2** | **108.8** | **0** | **0** | **4.8** | **0** | **8** | **161.6** | **0** | **3.2** | **77.2** | **0** | **0** | **3.2** | **0** | **0** | **0** | **930.0** |
| **Al-Menia** | **1.3** | **9.3** | **170.7** | **2.7** | **25.3** | **0** | **0** | **68** | **0** | **0** | **17.3** | **0** | **0** | **26.7** | **0** | **0** | **2.7** | **2.7** | **66.7** | **0** | **2.7** | **0** | **5.7** | **1.3** | **12** | **2.7** | **14.7** | **89.3** | **0** | **0** | **0** | **13.3** | **26.7** | **0** | **561.7** |
| **North and South Sinai** | **0** | **14.7** | **0** | **2.7** | **48** | **0** | **4** | **130.7** | **0** | **0** | **0** | **0** | **0** | **0** | **0** | **0** | **17** | **8** | **90.7** | **0** | **0** | **1.3** | **8** | **2.7** | **100** | **8** | **6.7** | **294.7** | **0** | **1.3** | **6.7** | **12** | **5.3** | **0** | **762.3** |
| **Egypt** | **3.3** | **126.5** | **170.7** | **126.7** | **1684.1** | **63.9** | **35.7** | **2219.4** | **8.9** | **1** | **132.7** | **1666.8** | **4** | **75.9** | **1.3** | **15** | **135. 3** | **74.9** | **642.9** | **1** | **7.7** | **24.1** | **70.7** | **76** | **1824.7** | **16.7** | **224.6** | **2455.1** | **1.3** | **1.3** | **57.5** | **45.3** | **228.9** | **1.3** | **12225.4** |

Total Colonies per Governorate were calculated by summing all CFU values across identified fungal species in each governorate. The final row “Egypt” represents the total CFUs across all sampled governorates. Ab. spp. (*Absidia spp.*), Al. alt. (*Alternaria alternata*), Ar. spp. (*Arthrobotrys spp.*), As. cla. (*Aspergillus clavatus*), As. fla. (*A. flavus*), As. fum. (*A. fumigatus*), As. gla. (*A. glaucus*), As. nig. (*A. niger*), As. och. (*A. ochraceus*), As. tam. (*A. tamarii*), As. ter. (*A. terreus*), Au. pul. (*Aureobasidium pullulans*), B. haw. (*Bipolaris hawaiiensis*), B. may. (*B. maydis*), B. tet. (*B. tetramera*), Bo. cin. (*Botrytis cinerea*), Ce. acr. (*Cephalosporium acremonium*), Ch. spp. (*Chaetomium spp.*), Cl. spp. (*Cladosporium spp.*), Co. spp. (*Colletotrichum spp.*), Cu. haw. (*Curvularia hawaiiensis*), Ep. pur. (*Epicoccum purpurascens*), F. inc. (*Fusarium incarnatum*), F. spp. (*Fusarium spp.*), F. ver. (*F. verticillioides*), Mu. spp. (*Mucor spp.*), Ni. spp. (*Nigrospora spp.*), Pe. spp. (*Penicillium spp.*), Ph. sp. (*Phoma sp.*), R. sol. (*Rhizoctonia solani*), R. sto. (*Rhizopus stolonifer*), St. spp. (*Stemphylium spp.*), T. spp. (*Trichoderma spp.*), and U. spp. (*Ulocladium spp.*). The final row labeled “Egypt” in the table represents the mean frequency (%) of each fungal species across all surveyed governorates, providing an overall profile of seed-borne fungal prevalence. This summary row was excluded from comparative analyses and visualizatio

**Table S2**. Total number of fungal colonies, species richness, and Shannon–Wiener diversity index (H) per governorate, along with mean ± SD of diversity indices based on eight site-level samples per region.

| **Governorate** | **Total Colonies per governorate** | **Richness**  **Per governorate** | **H index Collected** | **Richness**  **Mean per site** | **Richness**  **SD** | **H index**  **Mean per site** | **H index**  **SD** |
| --- | --- | --- | --- | --- | --- | --- | --- |
| **New Valley** | 605.8 | 13 | 1.80 | 11.00 | 2.33 | 1.72 | 0.17 |
| **Luxor** | 923.2 | 22 | 2.12 | 11.13 | 1.25 | 1.74 | 0.32 |
| **Assiut** | 727.0 | 18 | 2.14 | 14.13 | 3.31 | 1.98 | 0.25 |
| **Aswan** | 576.2 | 14 | 1.81 | 9.13 | 3.40 | 1.56 | 0.21 |
| **Al-Behera** | 362.7 | 22 | 2.46 | 12.75 | 5.06 | 2.11 | 0.30 |
| **Al-Gharbia** | 557.0 | 14 | 1.92 | 10.88 | 3.48 | 1.77 | 0.23 |
| **Al-Sharkia** | 197.0 | 9 | 1.92 | 7.00 | 1.60 | 1.74 | 0.26 |
| **Al-Dakhlia** | 572.3 | 14 | 1.76 | 9.75 | 2.66 | 1.60 | 0.22 |
| **Damietta** | 137.0 | 8 | 1.45 | 5.50 | 2.83 | 1.09 | 0.63 |
| **Kafr El-Sheikh** | 1009.6 | 11 | 1.02 | 7.50 | 3.02 | 0.77 | 0.37 |
| **Alexandria** | 528.0 | 14 | 1.94 | 10.75 | 3.73 | 1.71 | 0.40 |
| **Al-Nobaria** | 936.0 | 17 | 1.65 | 8.50 | 2.27 | 1.65 | 0.42 |
| **Al-Giza** | 1111.2 | 16 | 1.49 | 12.50 | 3.93 | 1.44 | 0.20 |
| **Al-Fayoum** | 702.4 | 13 | 1.52 | 7.00 | 1.51 | 1.38 | 0.20 |
| **Al-Ismaelia** | 1026.0 | 18 | 2.08 | 15.25 | 3.15 | 2.00 | 0.20 |
| **Port Said** | 930.0 | 16 | 2.08 | 12.63 | 3.29 | 1.84 | 0.37 |
| **Al-Menia** | 561.7 | 20 | 2.24 | 11.00 | 6.32 | 1.65 | 0.73 |
| **North and South Sinai** | 762.3 | 19 | 1.94 | 11.00 | 4.93 | 1.62 | 0.41 |

**Table S3.** Antagonistic activity of different *Trichoderma* isolates against *Fusarium verticillioides* in dual culture assays, illustrating comparative inhibition rates used to select the most effective biocontrol candidate

| ***Trichoderma* isolates** | **Growth of pathogens (%)1** | |
| --- | --- | --- |
| **Growth inhibition (%)1** | **Antagonism reaction 2** |
| T14+F | 74.03 ± 2.1 a3 | 1 |
| T30+F | 73.48 ± 1.84ab | 1 |
| T34+F | 71.67 ± 2.13a-c | 1 |
| T16+F | 71.11 ± 2.57a-c | 1 |
| T5+F | 70.16 ± 2.97a-d | 2 |
| T40+F | 69.44 ± 1.11a-e | 2 |
| T8 +F | 69.07 ± 1.53a-e | 1 |
| T6 +F | 69.05 ± 2.08a-e | 1 |
| T13+F | 68.5 ± 1.26a-e | 1 |
| T10+F | 68.49 ± 2.41a-e | 1 |
| T23+F | 68.33 ± 1.11a-e | 1 |
| T27+ F | 67.95 ± 1.5a-e | 1 |
| T37+F | 67.78 ± 1.28a-e | 2 |
| T9+F | 67.4 ± 2.1a-f | 2 |
| T29+F | 67.4 ± 1.05a-f | 1 |
| T 87+F | 67.22 ± 2.13a-f | 1 |
| T 82+F | 67.22 ± 1.11a-f | 1 |
| T11+F | 66.85 ± 1.85a-g | 1 |
| T60+F | 66.85 ± 1.85a-g | 2 |
| T102 | 66.84 ± 2.78a-g | 1 |
| T78+F | 66.32 ± 3.02b-g | 2 |
| T68+F | 66.3 ± 1.95b-g | 2 |
| T50+F | 66.3 ± 0.72b-g | 1 |
| T7+F | 66.01 ± 3.4c-g | 1 |
| T103+F | 65.75 ± 1.11c-g | 1 |
| T38+F | 65.75 ± 1.11c-g | 2 |
| T4 +F | 65.74 ± 2.37c-g | 2 |
| T52+F | 65.74 ± 1.52c-g | 1 |
| T81+F | 65.56 ± 1.28c-g | 2 |
| T101 | 65.17 ± 3.11c-g | 1 |
| T25+F | 64.65 ± 1.5c-h | 1 |
| T26+F | 64.64 ± 1.86c-h | 1 |
| T104 | 64.64 ± 0.39c-h | 1 |
| T 24+F | 64.44 ± 1.81c-h | 1 |
| T76+F | 63.53 ± 1.54d-i | 1 |
| T18+F | 63.33 ± 1.28d-i | 1 |
| T12 +F | 63.16 ± 4.54d-i | 1 |
| T 80+F | 62.22 ± 1.81e-j | 1 |
| T46+F | 60.24 ± 3.72f-j | 2 |
| T51+F | 60.22 ± 3.65f-j | 1 |
| T45+F | 60.22 ± 3.17f-j | 1 |
| T49+F | 60.21 ± 2.82f-j | 1 |
| T48+F | 59.67 ± 3.21g-j | 1 |
| T 55+F | 59.66 ± 3.86g-j | 1 |
| T36+F | 57.78 ± 2.57h-k | 1 |
| T 79+F | 56.67 ± 1.28i-l | 2 |
| T69+F | 55.24 ± 4.65j-l | 2 |
| T2 +F | 50.76 ± 4.41kl | 1 |
| T1 +F | 50.69 ± 5.8klc | 1 |
| T3 +F | 49.65 ± 4.09l | 1 |

1 Growth inhibition of F. verticillioides (%) = (Radius growth forF. verticillioides in the presence of *Trichoderma*)/ (Radius of growth in the lack of *Trichoderma*) x 100*.* 2 The antagonism reactions of *Trichoderma* with F. verticillioides was recorded based on the antagonism scale of Bell *et al*. (1982) after the 5th day of dual growth, using a scale of 1 to 5, where: 1 = *Trichoderma* overgrowing F. verticillioides and 5 = F. verticillioides overgrowing *Trichoderma*.3 Means within a column followed by different letter(s) are significantly different according to Tukey’s HSD test at p≤0.05. Values are presented as mean ± standard deviation (n=4).

Table S4. BLASTn (nucleotide BLAST**)** alignment for the nucleotide sequence and the similarity matches to *Trichoderma longibrachiatum* (T14) (PP768163.1).

| **Species** | **Scientific name** | **Accession number** | **Percentage of homology (%)** |
| --- | --- | --- | --- |
| *Trichoderma longibrachiatum* strain 18EPIT002 translation | *Trichoderma longibrachiatum* | MT881871.1 | 100 |
| *Trichoderma longibrachiatum* isolate JG9-31 translation | *Trichoderma longibrachiatum* | MN195113.1 | 100 |
| *Trichoderma longibrachiatum* strain 10-5 translation elongation | *Trichoderma longibrachiatum* | KF267252.1 | 100 |
| *Trichoderma longibrachiatum* strain 18AMEL004 translation | *Trichoderma longibrachiatum* | MT671921.1 | 100 |
| *Trichoderma longibrachiatum* strain 18EPLE009 translation | *Trichoderma longibrachiatum* | MT881874.1 | 100 |
| *Trichoderma bissettii* partial tef1a gene | *Trichoderma bissettii* | HG931266.1 | 100 |
| *Trichoderma longibrachiatum* strain 18ELIB022 translation | *Trichoderma longibrachiatum* | MT881869.1 | 100 |
| *Trichoderma longibrachiatum* strain ALG01 translation elongation | *Trichoderma longibrachiatum* | MT472841.1 | 100 |
| *Trichoderma longibrachiatum* isolate T10 translation elongation | *Trichoderma longibrachiatum* | OK500004.1 | 100 |
| *Trichoderma longibrachiatum* strain 18EPAE005 translation | *Trichoderma longibrachiatum* | MT881870.1 | 100 |
